# Supplementary material for: Prenatal Ultrasound Utilization and Associated Factors Among Pregnant Women Attending Antenatal Care in South Wollo Zone Public Hospitals, North East, Ethiopia,2023
Source: Research Square preprint supplement (doi:10.21203/rs.3.rs-5933006/v1), 2025-04-04
Supplement: Supplementary file 1 [file 736ae676e00f97ca7a5a7adb.docx]

# 9. ANNEXES

## Annexes- I

**Annex I- Information sheet**

Good morning/afternoon, my name is_________ and I am one of the data collector for the study being conducted by Belay susu, on a topic entitled “the prevalence of prenatal ultrasound utilization and associated factors among pregnant women attending ANC in South Wollo Zone Hospitals, North East Ethiopia, 2022’’.

For this study, you are selected as a participant and before getting your consent to participate in the study, all the necessary information that you need to know related to the study is stated as follows;

**Objective**: To Assess Utilization of Prenatal Ultrasound and Associated Factors among Pregnant Women Attending Antenatal Care in South Wollo Zone Hospitals, North East Ethiopia, 2022.

**Significance of the study**: The rationale of this study is to increase the standard of pregnancy care and provide evidence about existing constraints with the prevalence and associated factors of prenatal obstetric ultrasound utilization. The result of this study can also help as baseline data or source of information for further study. Your cooperation and willingness to participate for the study is very helpful

## [ANNEXES-II](file:///C:\Users\user\Desktop\proposal%20ppt\belay%20333333.docx#_Toc2588947)

[**English Version Questioners and Informed Consent Statement**](file:///C:\Users\user\Desktop\proposal%20ppt\belay%20333333.docx#_Toc2588947)

**Informed Consent Form**

Hello! My name is ____________________________. Here, at Wollo University, College of Medicine and Health Science, School of Nursing and Midwifery, Department of Midwifery; I will be undertaking research aimed to assess the proportion of prenatal ultrasound utilization and associated factors in South Wollo Zone Hospital, North East Ethiopia, 2022.

You are kindly requested to participate in this study and provide the information required. Your participation in this study is completely voluntary bases and you have a right to refuse, to take part, or to stop giving information at any time. For your participation in the study, no payment will be granted or has no special privilege to you. Besides, you’re not obligated to answer any question which you do not wish to answer. If you feel discomfort responding to any of the questions, please feel free to drop it any time you wish to do so. I assure you that your name will not be mentioned anywhere. Filling the questionnaire will take about 30 minutes. The information that you give me will be kept confidential and won’t be accessible to a third party; only be used for the research purpose and burnt at the end of the survey.

Could I have your permission to continue?

1. Yes 2. No. Stop and thank the respondents.

Name & Signature of interviewer: ____________________ Date: _______________

Name & Signature of Supervisor: _____________________Date: ______________

Respondents ID number .......................Health center……………………

**Supplementary files**

Table 1; Socio-demographic history of pregnant mothers attending ANC at South Wollo zone Public Hospitals North -east, Ethiopia from-to- 2022 G.C

| Code | Variables | Responses | Remark |
| --- | --- | --- | --- |
| 101 | How old are you? (put age in years) | ……………………………… |  |
| 102 | What is your marital status | 1.Married  2.Single  3.Divorced  4.Widowed |  |
| 103 | What is the highest grade you completed? | 1. College diploma and above 2. Secondary 3. Elementary 4. Unable to read and write |  |
| 104 | What is the highest grade your husband completed? | 1. College diploma and above 2. Tech. /voc. Certificate 3. Secondary 4. Elementary 5. Unable to read and write |  |
| 105 | Where do you live? | 1.Urban  2.Rural |  |
| 106 | If urban Q.No. 105.Duration of urban residence( Enter in years) | …………………………… |  |
| 107 | What is your Religion? | 1.Orthodox  2. Muslim 3. Catholics 4. Protestant 5. Other |  |
| 108 | What is your ethnicity? | 1.Oromo  2. Amhara 3. Tigrie 4. Guragie 5. Others |  |
| 109 | What is your occupation? | 1.Housewife  2. Student 3. Government employee 4. Private employee 5. Others |  |
| 110 | How much is your monthly income?(put in Ethiopian birr) | …………. |  |

Table 2: Obstetric History of Pregnant Women who attend ANC atSouth WolloZone PublicHospitals North-east, Ethiopia, 2022.

| Code | Variables | | Responses | Remark |
| --- | --- | --- | --- | --- |
| 200 | How many times have you ever been pregnant including this one? (put in number) | | .................. |  |
| 201 | How many times have you ever give birth?(put in number) | | ..................... |  |
| 202 | Have you ever had a pregnancy that miscarried, aborted, or ended in a stillbirth? | | 1.Yes  2.No |  |
| 203 | What is gestational age of current pregnancy?(put in exact month) | | …………… |  |
| 204 | When did you initiate ANC? | | …………….. |  |
| 205 | How many times did you receive antenatal care during last pregnancy? | | ……………. |  |
| 206 | Have you had ectopic pregnancy? | | 1. yes  2. no |  |
| 207 | Have you experience illness with recent or this pregnancy? | | 1.Yes  2.No |  |
| 208 | Have you had delivery of baby with congenital malformation? | | 1. Yes  2. No |  |
| 209 | If yes for Q 208, What was the mode of delivery for the recent child? | 1.SVD  2.CS | | Based on Q208 answer Q209 and Q210 |
| 210 | Birth weight of the baby at birth?(put in exact weight in kg) | ……………. | |  |

| Code | Variables | | | Responses | Remark | | |
| --- | --- | --- | --- | --- | --- | --- | --- |
| Part III: knowledgerelated questions on prenatal ultrasound utilization among pregnant women who attend ANC at South Wollo Zone North-east, Ethiopia, 2022. | | | | | | |
| 300 | Do you think ultrasound scan during pregnancy helps to confirm pregnancy? | | | 1. Yes 2. No | |  | |
| 301 | Do you think ultrasoundscan during pregnancy helps todetermine the fetal position? | | | 1. Yes 2. No | |  | |
| 302 | Do you think ultrasound scan during pregnancy helps to determine the cord and placenta position? | | | 1. Yes 2. No | |  | |
| 303 | Do you think ultrasound scan during pregnancy helps to determine the expected date of delivery? | | | 1. Yes 2. No | |  | |
| 304 | Do you think ultrasound scan during pregnancy helps to detect any defect or congenital abnormalities during pregnancy? | | | 1. Yes 2. No | |  | |
| 305 | Do you think ultrasound scan during pregnancy helps to detect complication of pregnancy? | | | 1. Yes 2. No | |  | |
| 306 | Do you think ultrasound scan during pregnancy helps to detect amniotic fluid volume? | | | 1. Yes 2. No | |  | |
| 307 | Do you think ultrasound scan during pregnancy helps to assess Wellbeing of the Fetus? | | | 1. Yes 2. No | |  | |
| 308 | Do you think ultrasound scan during pregnancy helps to confirm presence of multiple pregnancies? | | | 1. Yes 2. No | |  | |
| 309 | Do you think U/S scan during | | |  | |  | |
| 309 | Do you think ultrasound scan during pregnancy helps to estimate Weight fetal weight? | | | 1. Yes 2. No | |  | |
| 310 | Do you think ultrasound scan during pregnancy helps to estimate Gestational Age? | | | 1. Yes 2. No | |  | |
| 311 | Do you think every pregnant mother should have at least one U/S scan before 24 weeks of gestation? | | | 1. Yes  2. No | |  | |
| Table4: Attitude question on prenatal ultrasound utilization among pregnant women who attend ANC at South Wollo Zone North-east, Ethiopia, 2022. | | | | | | | |
| Code | Variables | | Responses | | | Remark | |
| 400 | Obstetric ultrasound is safe for the mother. | | | 1. Strongly Disagree  2. Disagree  3. Not Sure  4. Agree  5. Strongly Agree | |  | |
| 401 | Obstetrical ultrasound is safe for fetus | | | 1. Strongly Disagree  2. Disagree  3. Not Sure  4. Agree  5. Strongly Agree | |  | |
| 402 | Obstetric ultrasonography can lead to congenital anomaly. | | | 1.Strongly Disagree  2.Disagree  3.Not Sure  4. Agree  5. Strongly Agree | |  | |
| 403 | Obstetrical ultrasound in an essential investigation during pregnancy | | | 1.Strongly Disagree  2.Disagree  3.Not Sure  4. Agree  5. Strongly Agree | |  | |
| 404 | To know the sex of your child before birth is right | | | 1.Strongly Disagree  2.Disagree  3.Not Sure  4. Agree  5. Strongly Agree | |  | |
| 405 | Terminating the pregnancy if the sex of the child is other than you prefer is right decision | | | 1.Strongly Disagree  2.Disagree  3.Not Sure  4. Agree  5. Strongly Agree | |  | |
| 406 | Educating others about obstetrical ultrasound is necessary | | | 1.Strongly Disagree  2.Disagree  3.Not Sure  4. Agree  5. Strongly Agree | |  | |
| 407 | Ultrasound needs to be offered routinely | | | 1.Strongly Disagree  2.Disagree  3.Not Sure  4. Agree  5. Strongly Agree | |  | |
| Table 5: Questions related to prenatal ultrasound utilization among pregnant women who attend ANC at South Wollo Zone North-east, Ethiopia, 2022. | | | | | | | |
| Code | | Variables | | Responses | | | remark |
| 500 | | Have you ever exposed to obstetric u/s scan? | | 1. yes  2. no | | |  |
| 501 | | If yes to question number 500, at what gestational age? | | 1. <24 weeks 2. >24 weeks 3. Do not remember | | |  |
| 502 | | If yes to question number 500, Who request the ultrasound scan? | | 1. Clinician  2. Herself  3. Do not remember | | |  |
| 503 | | If No to question number 500, what was your reason? | | 1. I think it is not necessary 2. I fear it would have injury to me and my baby 3. I did not have the information 4. I can’t access it 5. Lack of money 6. Other(specify)________ | | |  |

Thank you for your patience and cooperation for responding the question

Name of the data collectors____________________

Sign ______________________________________

Date _________________________
